# Supplementary material
Source: publisher figshare collection journal article supplement (https://acs.figshare.com/ndownloader/files/17425199)
Supplement: Supplementary file 1 [file 17425199]

## Supplement Information

# Magnetic Reactive Oxygen Species Nanoreactor for Switchable Magnetic Resonance Imaging Guided Cancer Therapy Based on pH-Sensitive Fe<sub>5</sub>C<sub>2</sub>@Fe<sub>3</sub>O<sub>4</sub> Nanoparticles

Jing Yu,<sup>1, ¶</sup> Fan Zhao,<sup>1, ¶</sup> Weiliang Gao,<sup>1</sup> Xue Yang,<sup>2</sup> Yanmin Ju,<sup>3</sup> Lingyun Zhao,<sup>4</sup> Weisheng Guo,<sup>5</sup> Jun Xie,<sup>6</sup> Xing-jie Liang,<sup>5</sup> Xinyong Tao,<sup>1</sup> Juan Li,<sup>1</sup> Yao Ying,<sup>1</sup> Wangchang Li,<sup>1</sup> Jingwu Zheng,<sup>1</sup> Liang Qiao,<sup>1</sup> Subin Xiong,<sup>7</sup> Xiaozhou Mou,<sup>2,\*</sup> Shenglei Che,<sup>1,\*</sup> and Yanglong Hou<sup>3,\*</sup>

<sup>1</sup>College of Materials Science and Engineering, Zhejiang University of Technology, Hangzhou 310014, China

<sup>2</sup>Clinical Research Institute, Zhejiang Provincial People's Hospital, Hangzhou 310014, China

<sup>3</sup>Beijing Key Laboratory for Magnetoelectric Materials and Device, Beijing Innovation Center for Engineering Science and Advanced Technology, Department of Materials Science and Engineering, College of Engineering, Peking University, Beijing 100871, China

<sup>4</sup>Key Laboratory of Advanced Materials, Ministry of Education, School of Material Science & Engineering, Tsinghua University, Beijing 100084, China

<sup>5</sup>CAS Center for Excellence in Nanoscience, Chinese Academy of Sciences, CAS Key Laboratory for Biological Effects of Nanomaterials & Nanosafety, National Center for Nanoscience and Technology, No. 11 Beiyitiao, Zhongguancun, Beijing 100190, China

<sup>6</sup>School of Life Science, Jiangsu Normal University, Xuzhou 221116, China

<sup>7</sup>College of pharmacy, Zhejiang University of Technology, Hangzhou 310014, China

\*Corresponding authors (E-mail: mouxz@zju.edu.cn; cheshenglei@zjut.edu.cn; hou@pku.edu.cn)

## Table of contents

### Supporting Figures

|                                                                                                                                                                                                                                                                                                                                                                                                                                                                     |    |
|---------------------------------------------------------------------------------------------------------------------------------------------------------------------------------------------------------------------------------------------------------------------------------------------------------------------------------------------------------------------------------------------------------------------------------------------------------------------|----|
| Figure S1 DLS spectrum of $\text{Fe}_5\text{C}_2@\text{Fe}_3\text{O}_4$ NPs.....                                                                                                                                                                                                                                                                                                                                                                                    | 4  |
| Figure S2 Fe 2p XPS spectrum of $\text{Fe}_5\text{C}_2@\text{Fe}_3\text{O}_4$ NPs.....                                                                                                                                                                                                                                                                                                                                                                              | 4  |
| Figure S3 TEM image of $\text{Fe}_5\text{C}_2@\text{Fe}_3\text{O}_4$ NPs after 7 days storage in air.....                                                                                                                                                                                                                                                                                                                                                           | 5  |
| Figure S4 DLS spectrum of $\text{Fe}_5\text{C}_2@\text{Fe}_3\text{O}_4$ NPs after 7 days storage in air.....                                                                                                                                                                                                                                                                                                                                                        | 5  |
| Figure S5 TEM image of 20 nm $\text{Fe}_5\text{C}_2@\text{C}$ NPs.....                                                                                                                                                                                                                                                                                                                                                                                              | 6  |
| Figure S6 TEM image of $\text{PEG}/\text{Fe}_5\text{C}_2@\text{Fe}_3\text{O}_4$ NPs by dispersing in pH 5.4 with different time (a 0h, b 1h, c 2h, d 4h).....                                                                                                                                                                                                                                                                                                       | 6  |
| Figure S7 DLS spectrum of $\text{PEG}/\text{Fe}_5\text{C}_2@\text{Fe}_3\text{O}_4$ NPs dispersing in pH 5.4 with different time.....                                                                                                                                                                                                                                                                                                                                | 6  |
| Figure S8 Photographs of $\text{PEG}/\text{Fe}_5\text{C}_2@\text{Fe}_3\text{O}_4$ NPs dispersing in (a) pH 5.4, (b) pH 6.5 and (c) pH 7.4 for 4 h.....                                                                                                                                                                                                                                                                                                              | 7  |
| Figure S9 TEM image of $\text{PEG}/\text{Fe}_5\text{C}_2@\text{C}$ NPs by dispersing in pH 5.4 solution for 4 h.....                                                                                                                                                                                                                                                                                                                                                | 7  |
| Figure S10 Accumulative iron ion release of $\text{PEG}/\text{Fe}_5\text{C}_2@\text{Fe}_3\text{O}_4$ , $\text{PEG}/\text{Fe}_5\text{C}_2@\text{C}$ and $\text{PEG}/\text{Fe}_3\text{O}_4$ NPs at pH 6.5.....                                                                                                                                                                                                                                                        | 8  |
| Figure S11 Photo of (a, b) potassium ferricyanide dispersed $\text{PEG}/\text{Fe}_5\text{C}_2@\text{Fe}_3\text{O}_4$ NPs solution at (a) pH 7.4 and (b) pH 5.4 for 24 h. (c) Photo of potassium thiocyanate dispersed $\text{PEG}/\text{Fe}_5\text{C}_2@\text{Fe}_3\text{O}_4$ NPs solution at pH 5.4 for 24 h.....                                                                                                                                                 | 8  |
| Figure S12 Room-temperature magnetic hysteresis loops of $\text{PEG}/\text{Fe}_5\text{C}_2@\text{Fe}_3\text{O}_4$ NPs.....                                                                                                                                                                                                                                                                                                                                          | 9  |
| Figure S13 Cell viability of 4T1 cells after 24 h incubation with different concentrations.....                                                                                                                                                                                                                                                                                                                                                                     | 9  |
| Figure S14 Cell viability of 4T1 cells after 24 h incubation with $\text{PEG}/\text{Fe}_5\text{C}_2@\text{C}$ NPs or $\text{PEG}/\text{Fe}_5\text{C}_2@\text{C}$ NPs + $\text{H}_2\text{O}_2$ ( $50 \mu\text{mol L}^{-1}$ ) with or without magnetic field.....                                                                                                                                                                                                     | 10 |
| Figure S15 Cell viability of 4T1 cells after 24 h incubation with $\text{PEG}/\text{Fe}_3\text{O}_4$ NPs or $\text{PEG}/\text{Fe}_3\text{O}_4$ NPs + $\text{H}_2\text{O}_2$ ( $50 \mu\text{mol L}^{-1}$ ) with or without magnetic field.....                                                                                                                                                                                                                       | 10 |
| Figure S16 Cell viability of 4T1 cells after 24 h incubation with different NPs in different conditions at concentration of $400 \mu\text{g Fe mL}^{-1}$ .....                                                                                                                                                                                                                                                                                                      | 11 |
| Figure S17 The representative Prussian blue staining of 4T1 cells (a) with and (b) without magnetic targeting.....                                                                                                                                                                                                                                                                                                                                                  | 11 |
| Figure S18 Fluorescence image of DCFH-DA labeled 4T1 cells treated by $\text{PEG}/\text{Fe}_5\text{C}_2@\text{Fe}_3\text{O}_4$ NPs + $\text{H}_2\text{O}_2$ ( $50 \mu\text{mol L}^{-1}$ ) under magnetic targeting.....                                                                                                                                                                                                                                             | 12 |
| Figure S19 (a) Cell viability studies in 293T cells model after incubation with $\text{PEG}/\text{Fe}_5\text{C}_2@\text{Fe}_3\text{O}_4$ NPs or $\text{PEG}/\text{Fe}_5\text{C}_2@\text{Fe}_3\text{O}_4$ NPs + $\text{H}_2\text{O}_2$ ( $50 \mu\text{mol L}^{-1}$ ) with or without magnetic field. (b) Cell viability of 4T1 or 293T cells after 24 h incubation with different NPs in different conditions at concentration of $400 \mu\text{g Fe mL}^{-1}$ ..... | 12 |
| Figure S20 Cell viability studies on 293T, L929, L02 and 4T1 cells after incubation                                                                                                                                                                                                                                                                                                                                                                                 |    |

|                                                                                                                                                                                                                                                                                                                                                                                                                                                                                                                                                                                                                                                            |    |
|------------------------------------------------------------------------------------------------------------------------------------------------------------------------------------------------------------------------------------------------------------------------------------------------------------------------------------------------------------------------------------------------------------------------------------------------------------------------------------------------------------------------------------------------------------------------------------------------------------------------------------------------------------|----|
| with PEG/Fe <sub>5</sub> C <sub>2</sub> @Fe <sub>3</sub> O <sub>4</sub> NPs.....                                                                                                                                                                                                                                                                                                                                                                                                                                                                                                                                                                           | 13 |
| Figure S21 Intensity change of <i>T</i> <sub>2</sub> -weighted MR signal before and after <i>i.v.</i> injection with or without magnetic targeting. ....                                                                                                                                                                                                                                                                                                                                                                                                                                                                                                   | 13 |
| Figure S22 <i>T</i> <sub>2</sub> -weighted MR images of 4T1 tumor-bearing mice (a) before, (b) immediately post, and (c) 1 day after <i>i.t.</i> injection of PEG/Fe <sub>5</sub> C <sub>2</sub> @Fe <sub>3</sub> O <sub>4</sub> NPs. (d) Intensity changes of <i>T</i> <sub>2</sub> -weighted MR signal immediately or 1 day after <i>i.t.</i> injection.....                                                                                                                                                                                                                                                                                             | 14 |
| Figure S23 (A) <i>T</i> <sub>1</sub> -weighted MR images of 4T1 tumor-bearing mice (a) before, (b) immediately post, and (c) one day after <i>i.t.</i> injection of PEG/Fe <sub>3</sub> O <sub>4</sub> NPs. (d) Intensity changes of <i>T</i> <sub>1</sub> -weighted MR signal immediately or one day after <i>i.t.</i> injection. (B) <i>T</i> <sub>2</sub> -weighted MR images of 4T1 tumor-bearing mice (a) before, (b) immediately post, and (c) 1 day after <i>i.t.</i> injection of PEG/Fe <sub>3</sub> O <sub>4</sub> NPs. (d) Intensity changes of <i>T</i> <sub>2</sub> -weighted MR signal immediately or 1 day after <i>i.t.</i> injection..... | 14 |
| Figure S24 Fluorescence intensities of DCFH-DA labeled mice tumors by different treatments.....                                                                                                                                                                                                                                                                                                                                                                                                                                                                                                                                                            | 15 |
| Figure S25 Photographs at day 19 of tumor from group (a) Control, (b) <i>i.v.</i> injection of PEG/Fe <sub>5</sub> C <sub>2</sub> @Fe <sub>3</sub> O <sub>4</sub> NPs, (c) <i>i.v.</i> injection of PEG/Fe <sub>5</sub> C <sub>2</sub> @Fe <sub>3</sub> O <sub>4</sub> NPs with magnetic targeting, (d) <i>i.t.</i> injection of PEG/Fe <sub>5</sub> C <sub>2</sub> @Fe <sub>3</sub> O <sub>4</sub> NPs.....                                                                                                                                                                                                                                               | 15 |
| Figure S26 H&E stained images of major organs collected from different groups of mice.....                                                                                                                                                                                                                                                                                                                                                                                                                                                                                                                                                                 | 16 |
| Figure S27 Time course change in the relative tumor volume after different treatments. (Control group, <i>i.t.</i> injection of PEG/Fe <sub>3</sub> O <sub>4</sub> NPs group, <i>i.t.</i> injection of PEG/Fe <sub>5</sub> C <sub>2</sub> @Fe <sub>3</sub> O <sub>4</sub> NPs group, <i>i.t.</i> injection of Fe <sup>2+</sup> group).....                                                                                                                                                                                                                                                                                                                 | 16 |
| Figure S28 Photographs at day 19 of tumor from group (a) Control, (b) <i>i.t.</i> injection of PEG/Fe <sub>3</sub> O <sub>4</sub> NPs, (c) <i>i.t.</i> injection of PEG/Fe <sub>5</sub> C <sub>2</sub> @Fe <sub>3</sub> O <sub>4</sub> NPs, (d) <i>i.t.</i> injection of Fe <sup>2+</sup> .....                                                                                                                                                                                                                                                                                                                                                            | 17 |
| Figure S29 (A) <i>T</i> <sub>1</sub> -weighted MR images of 4T1 tumor-bearing mice (a) before, (b) immediately post, and (c) one day after <i>i.t.</i> injection of Fe <sup>2+</sup> ions. (d) Intensity changes of <i>T</i> <sub>1</sub> -weighted MR signal immediately or one day after <i>i.t.</i> injection. (B) <i>T</i> <sub>2</sub> -weighted MR images of 4T1 tumor-bearing mice (a) before, (b) immediately post, and (c) 1 day after <i>i.t.</i> injection of Fe <sup>2+</sup> ions. (d) Intensity changes of <i>T</i> <sub>2</sub> -weighted MR signal immediately or 1 day after <i>i.t.</i> injection.....                                   | 17 |
| Figure S30 (A) <i>In vivo</i> NIR imaging of tumor-bearing mice intravenous injected with IR783-labeled PEG/Fe <sub>5</sub> C <sub>2</sub> @Fe <sub>3</sub> O <sub>4</sub> NPs at 1, 3, 6, and 24 h post-injection with or without magnetic targeting. (B) NIR imaging of various tissues at 24 h post-injection with or without magnetic targeting.....                                                                                                                                                                                                                                                                                                   | 18 |
| Figure S31 The biodistribution of Fe in main tissues and tumors after <i>i.v.</i> injection with or without magnetic targeting for 24 h.....                                                                                                                                                                                                                                                                                                                                                                                                                                                                                                               | 18 |

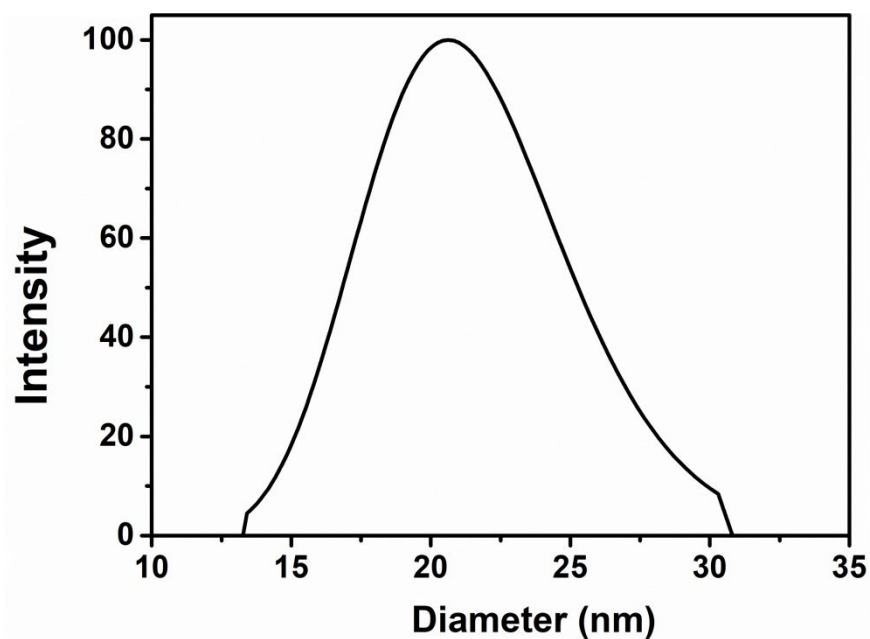

**Figure S1.** DLS spectrum of  $\text{Fe}_5\text{C}_2@\text{Fe}_3\text{O}_4$  NPs.

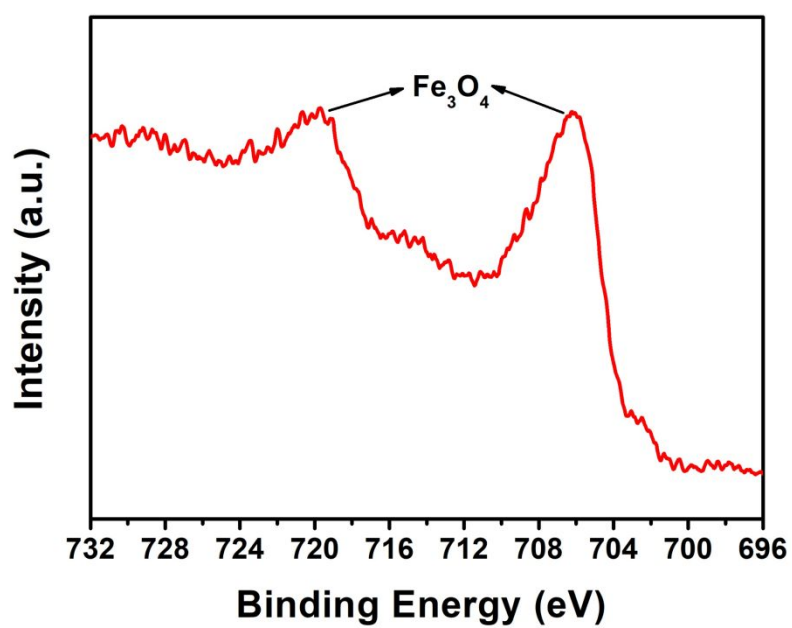

**Figure S2.** Fe 2p XPS spectrum of  $\text{Fe}_5\text{C}_2@\text{Fe}_3\text{O}_4$  NPs.

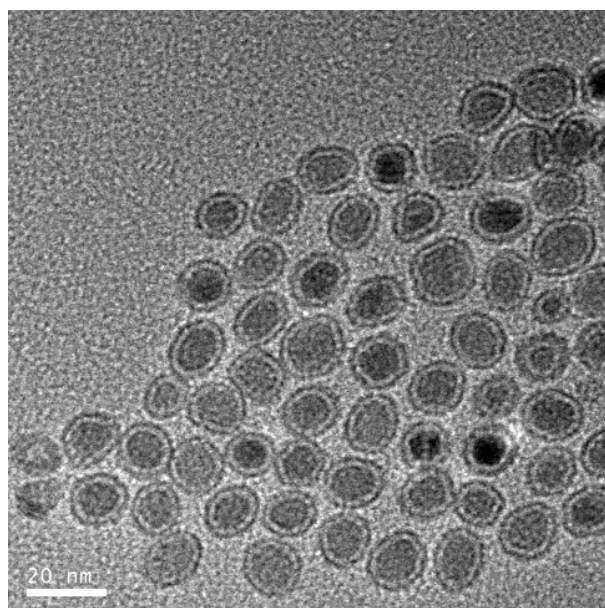

**Figure S3.** TEM image of  $\text{Fe}_5\text{C}_2@\text{Fe}_3\text{O}_4$  NPs after 7 days storage in air.

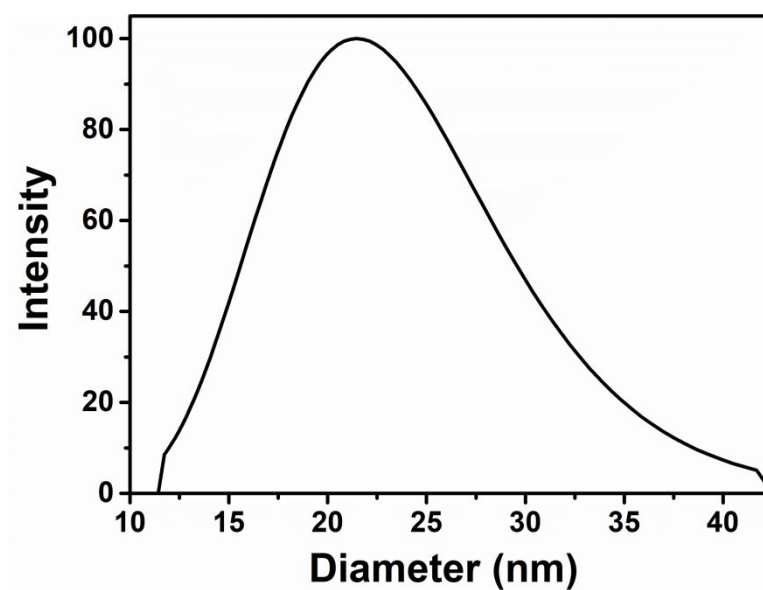

**Figure S4.** DLS spectrum of  $\text{Fe}_5\text{C}_2@\text{Fe}_3\text{O}_4$  NPs after 7 days storage in air.

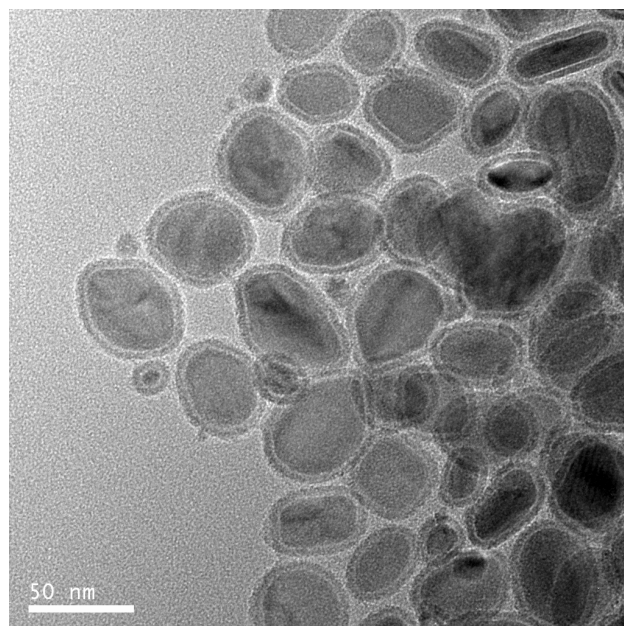

**Figure S5.** TEM image of 20 nm  $\text{Fe}_5\text{C}_2@\text{C}$  NPs.

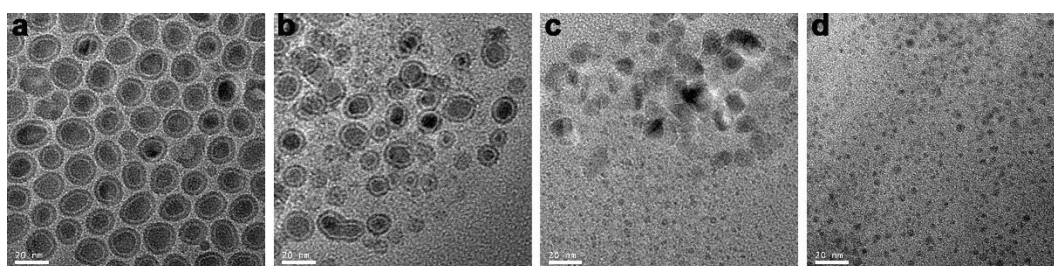

**Figure S6.** TEM image of  $\text{PEG}/\text{Fe}_5\text{C}_2@\text{Fe}_3\text{O}_4$  NPs by dispersing in pH 5.4 with different time (**a** 0h, **b** 1h, **c** 2h, **d** 4h).

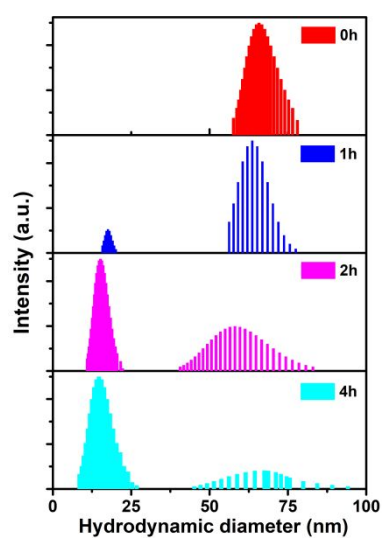

**Figure S7.** DLS spectrum of  $\text{PEG}/\text{Fe}_5\text{C}_2@\text{Fe}_3\text{O}_4$  NPs dispersing in pH 5.4 with different time.



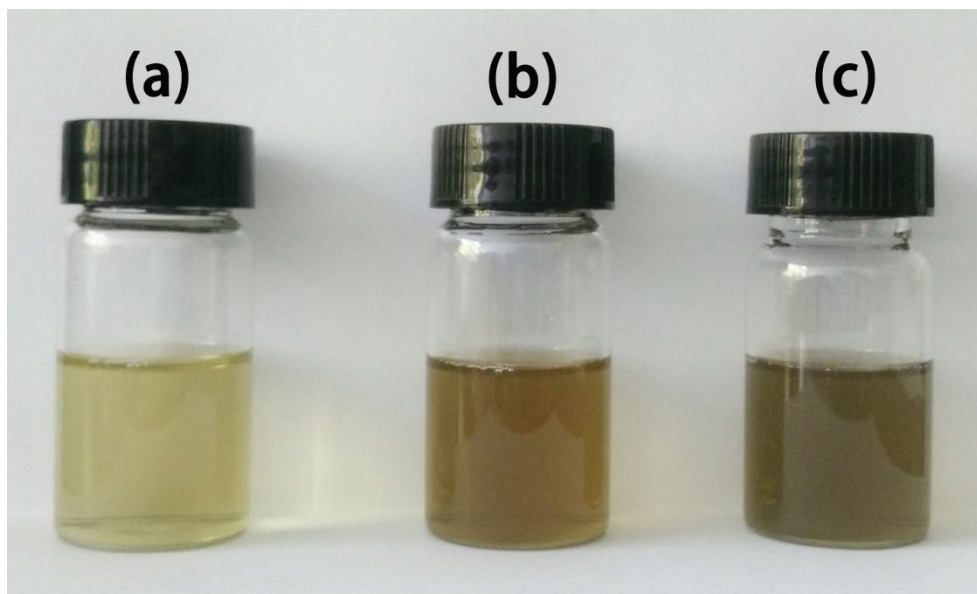

**Figure S8.** Photograph of PEG/Fe<sub>5</sub>C<sub>2</sub>@Fe<sub>3</sub>O<sub>4</sub> NPs dispersing in (a) pH 5.4, (b) pH 6.5 and (c) pH 7.4 for 4 h.

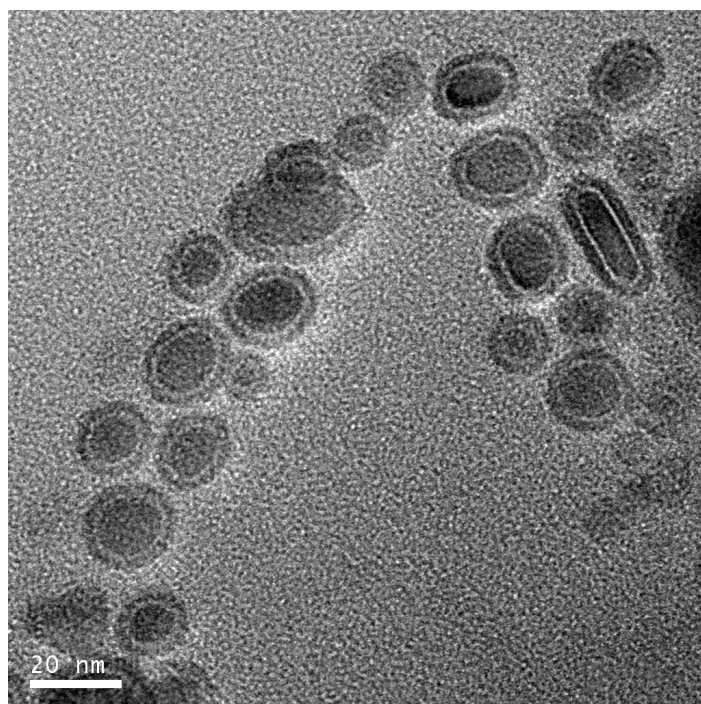

**Figure S9.** TEM image of PEG/Fe<sub>5</sub>C<sub>2</sub>@C NPs by dispersing in pH 5.4 solution for 4 h.

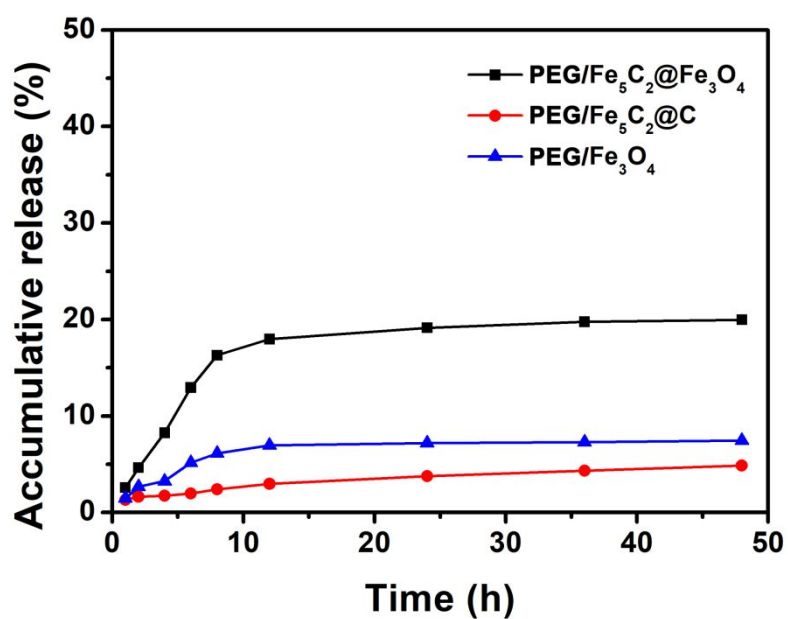

**Figure S10.** Accumulative iron ion release of PEG/Fe<sub>5</sub>C<sub>2</sub>@Fe<sub>3</sub>O<sub>4</sub>, PEG/Fe<sub>5</sub>C<sub>2</sub>@C and PEG/Fe<sub>3</sub>O<sub>4</sub> NPs at pH 6.5.

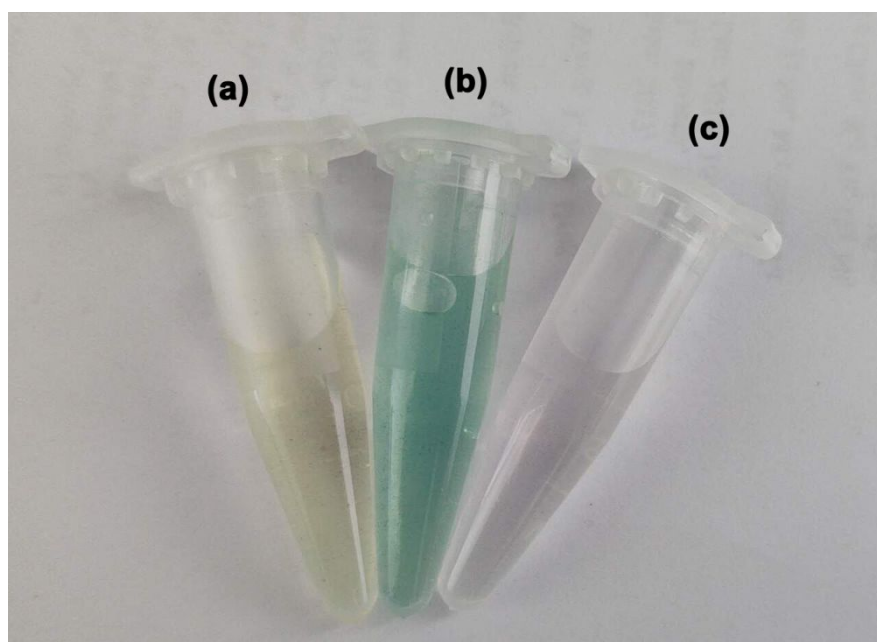

**Figure S11.** Photo of (a, b) potassium ferricyanide dispersed PEG/Fe<sub>5</sub>C<sub>2</sub>@Fe<sub>3</sub>O<sub>4</sub> NPs solution at (a) pH 7.4 and (b) pH 5.4 for 24 h. (c) Photo of potassium thiocyanate dispersed PEG/Fe<sub>5</sub>C<sub>2</sub>@Fe<sub>3</sub>O<sub>4</sub> NPs solution at pH 5.4 for 24 h.



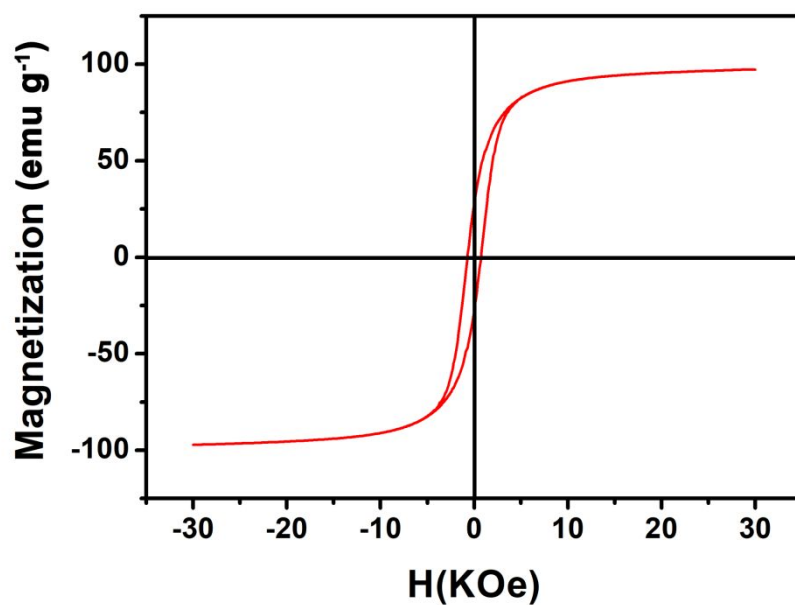

**Figure S12.** Room-temperature magnetic hysteresis loops of PEG/Fe<sub>5</sub>C<sub>2</sub>@Fe<sub>3</sub>O<sub>4</sub> NPs.

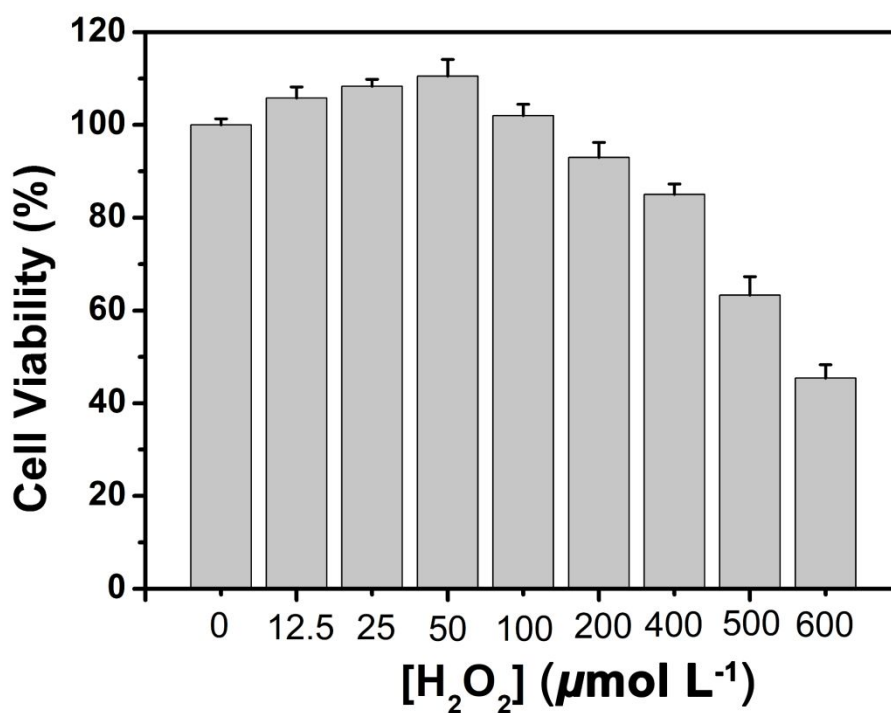

**Figure S13.** Cell viability of 4T1 cells after 24 h incubation with different concentrations of H<sub>2</sub>O<sub>2</sub>.

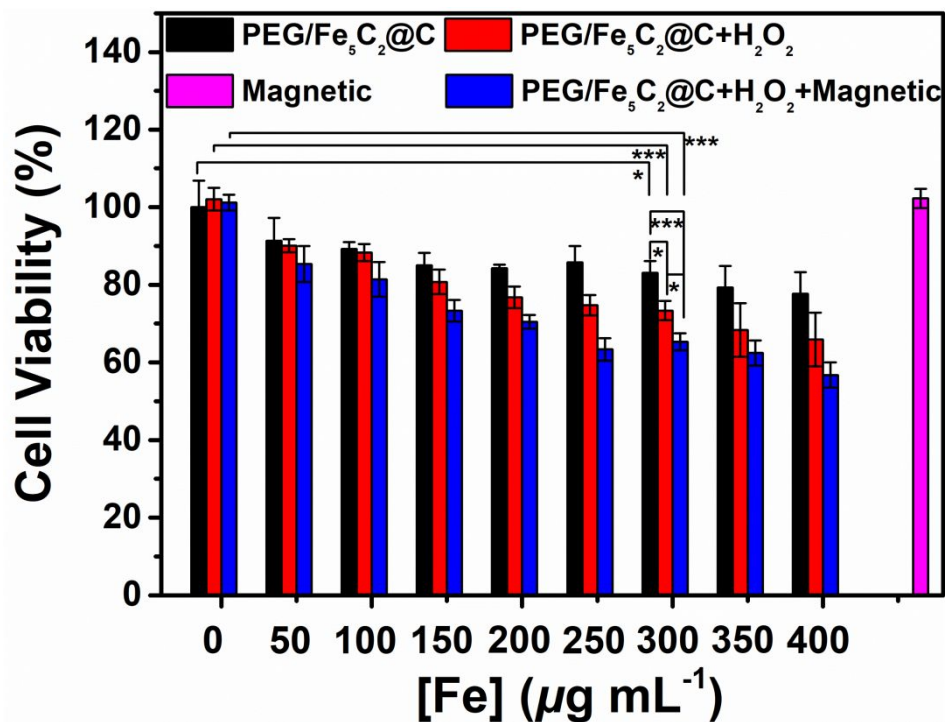

**Figure S14.** Cell viability of 4T1 cells after 24 h incubation with PEG/Fe<sub>5</sub>C<sub>2</sub>@C NPs or PEG/Fe<sub>5</sub>C<sub>2</sub>@C NPs + H<sub>2</sub>O<sub>2</sub> (50  $\mu\text{mol L}^{-1}$ ) with or without magnetic field. (n = 6, mean  $\pm$  s.d., \*\* $p$  < 0.01).

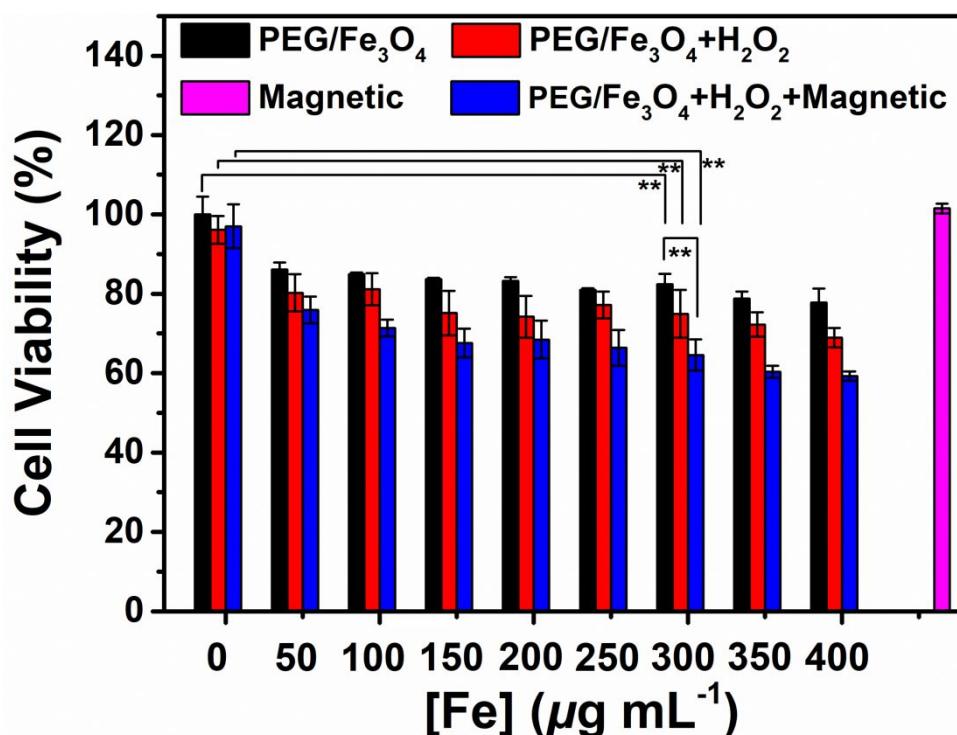

**Figure S15.** Cell viability of 4T1 cells after 24 h incubation with PEG/Fe<sub>3</sub>O<sub>4</sub> NPs or PEG/Fe<sub>3</sub>O<sub>4</sub> NPs + H<sub>2</sub>O<sub>2</sub> (50  $\mu\text{mol L}^{-1}$ ) with or without magnetic field. (n = 6, mean  $\pm$  s.d., \*\* $p$  < 0.01).

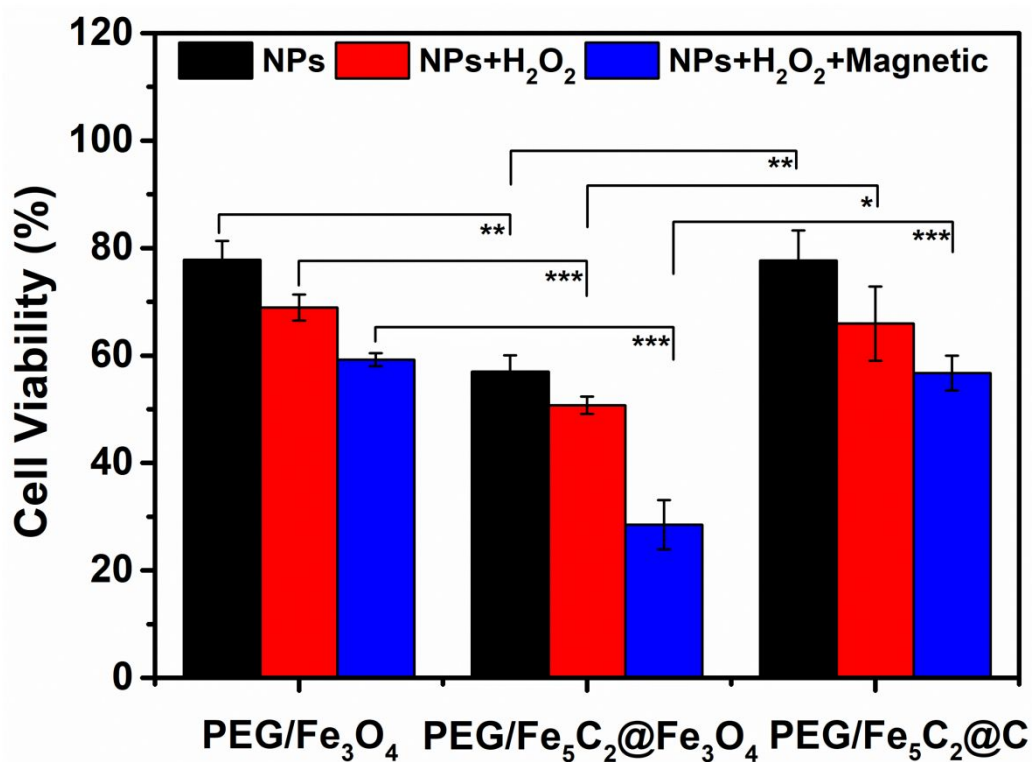

**Figure S16.** Cell viability of 4T1 cells after 24 h incubation with different NPs in different conditions at concentration of 400  $\mu\text{g Fe mL}^{-1}$ . The  $\text{H}_2\text{O}_2$  concentration was 50  $\mu\text{mol L}^{-1}$ . (n = 6, mean  $\pm$  s.d., \* $p$  < 0.05, \*\* $p$  < 0.01, and \*\*\* $p$  < 0.001).

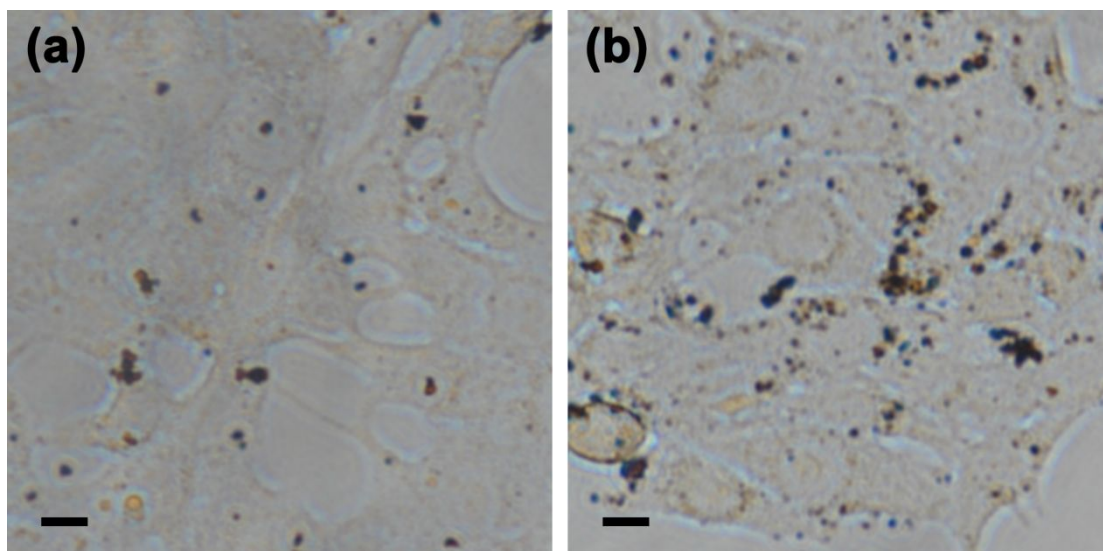

**Figure S17.** The representative Prussian blue staining of 4T1 cells (a) without and (b) with magnetic targeting. Scale bars are 20  $\mu\text{m}$ .

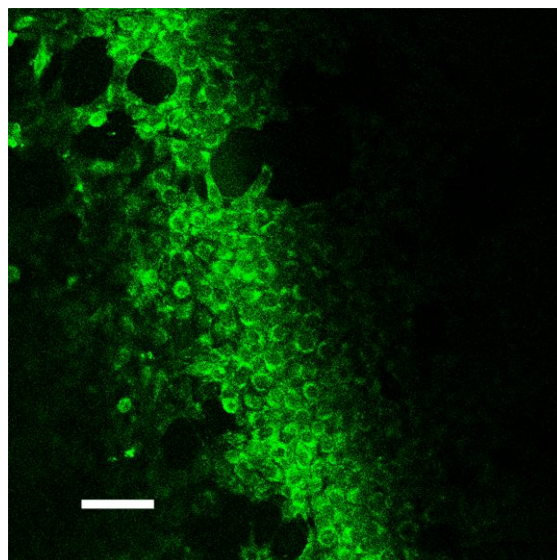

**Figure S18.** Fluorescence image of DCFH-DA labeled 4T1 cells treated by PEG/Fe<sub>5</sub>C<sub>2</sub>@Fe<sub>3</sub>O<sub>4</sub> NPs + H<sub>2</sub>O<sub>2</sub> (50 μmol L<sup>-1</sup>) under magnetic targeting. Scale bars are 75 μm.

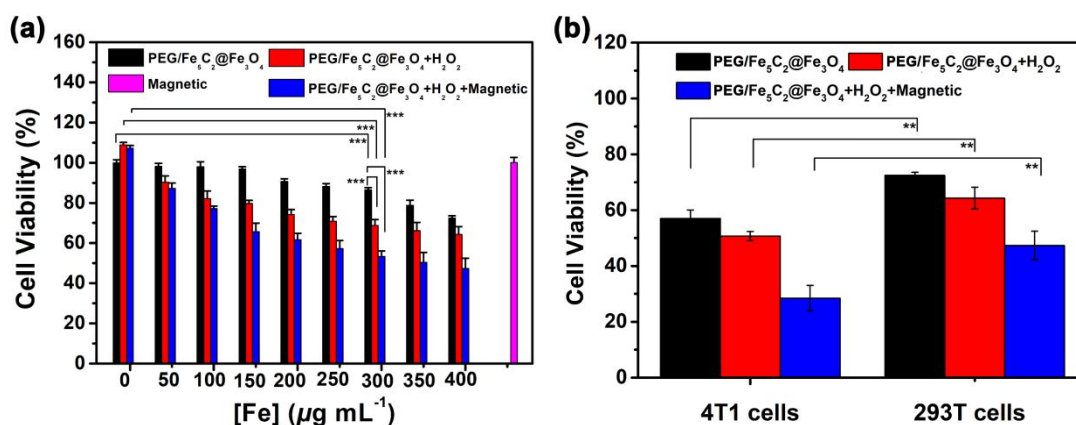

**Figure S19.** (a) Cell viability studies in 293T cells model after incubation with PEG/Fe<sub>5</sub>C<sub>2</sub>@Fe<sub>3</sub>O<sub>4</sub> NPs or PEG/Fe<sub>5</sub>C<sub>2</sub>@Fe<sub>3</sub>O<sub>4</sub> NPs + H<sub>2</sub>O<sub>2</sub> (50 μmol L<sup>-1</sup>) with or without magnetic field. (b) Cell viability of 4T1 or 293T cells after 24 h incubation with different NPs in different conditions at concentration of 400 μg Fe mL<sup>-1</sup>. The H<sub>2</sub>O<sub>2</sub> concentration was 50 μmol L<sup>-1</sup>. (n = 6, mean ± s.d., \*\**p* < 0.01, and \*\*\**p* < 0.001).

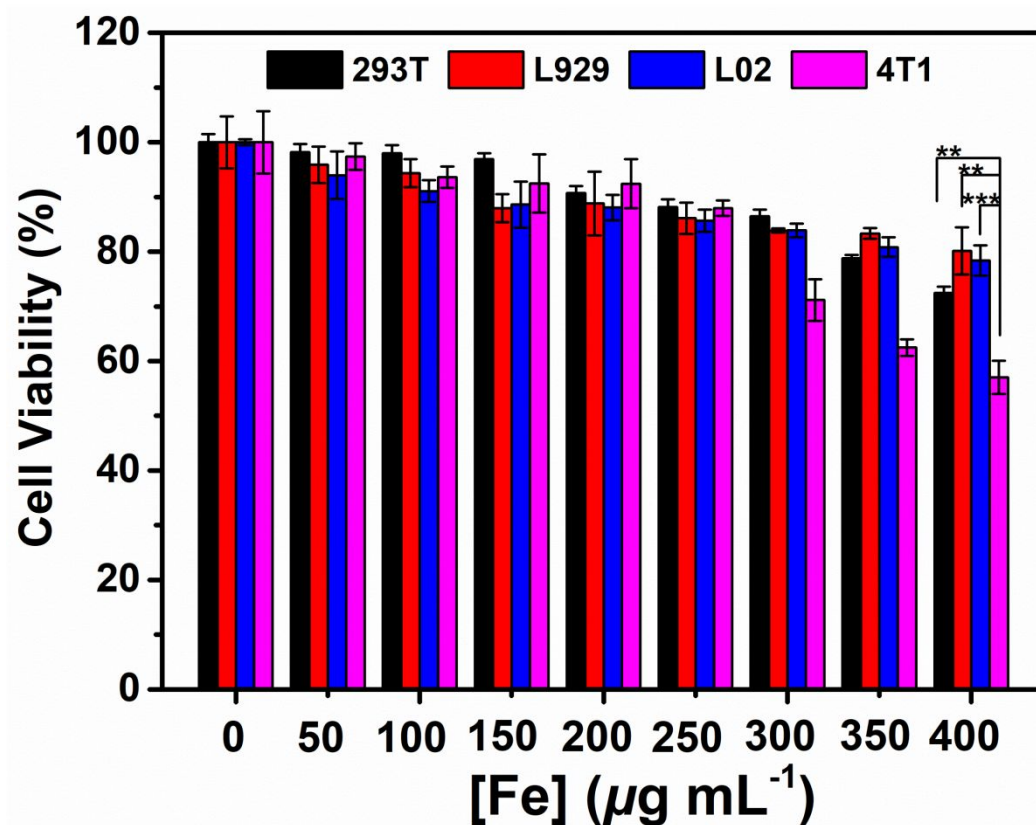

**Figure S20.** Cell viability studies on 293T, L929, L02 and 4T1 cells after incubation with PEG/Fe<sub>5</sub>C<sub>2</sub>@Fe<sub>3</sub>O<sub>4</sub> NPs. (n = 6, mean ± s.d., \*\*p < 0.01, and \*\*\*p < 0.001).

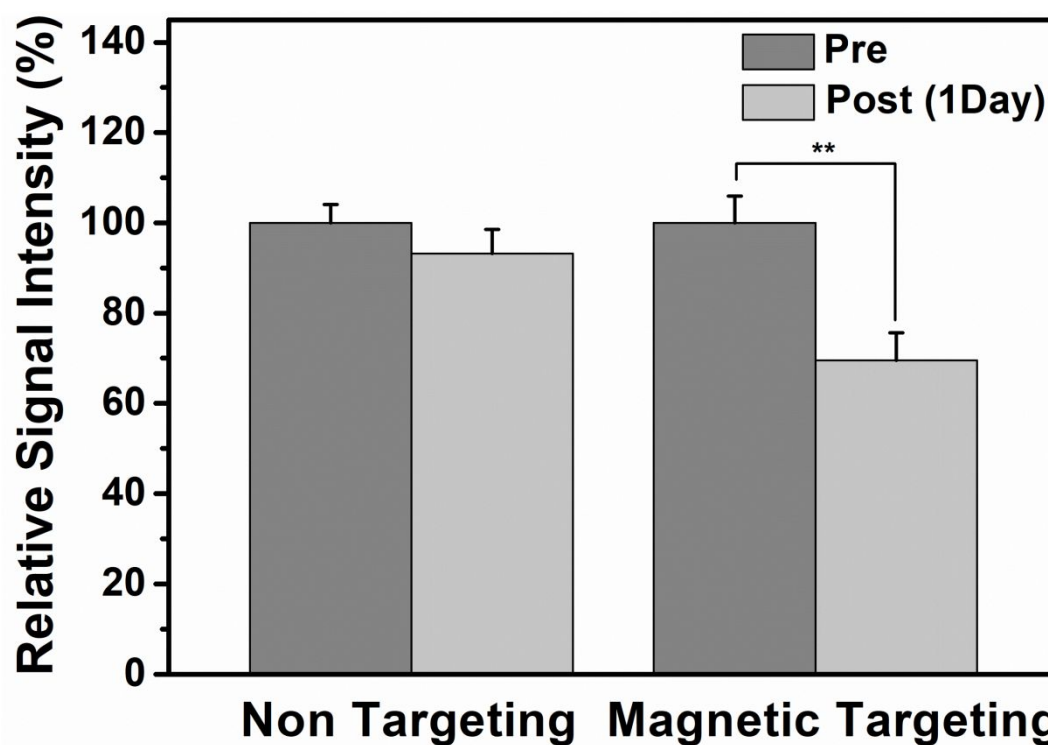

**Figure S21.** Intensity change of T<sub>2</sub>-weighted MR signal before and after i.v. injection with or without magnetic targeting. (n = 3, mean ± s.d., \*\*p < 0.01).

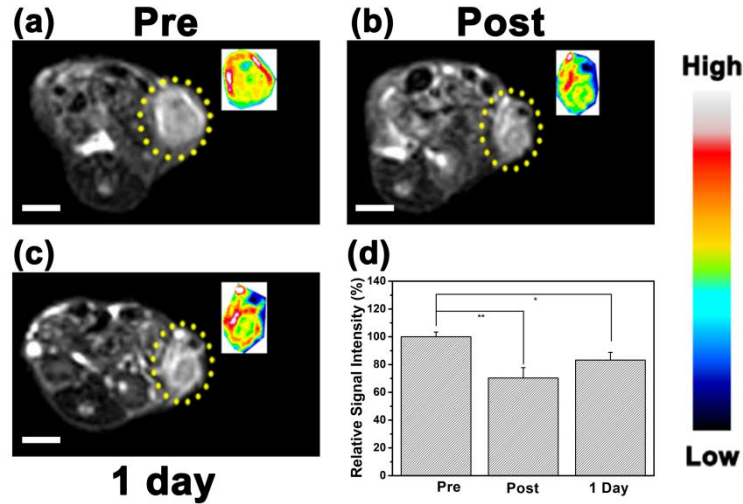

**Figure S22.** Representative  $T_2$ -weighted MR images of 4T1 tumor-bearing mice (a) before, (b) immediately post, and (c) 1 day after *i.t.* injection of PEG/ $\text{Fe}_5\text{C}_2@/\text{Fe}_3\text{O}_4$  NPs. The tumor sites are circled by a yellow dashed line. Figure at the top right corner is the pseudo-color image of the tumor site. (d) Intensity changes of  $T_2$ -weighted MR signal immediately or 1 day after *i.t.* injection. Scale bars are 5 mm. (n = 3, mean  $\pm$  s.d., \* $p$  < 0.05, \*\* $p$  < 0.01).

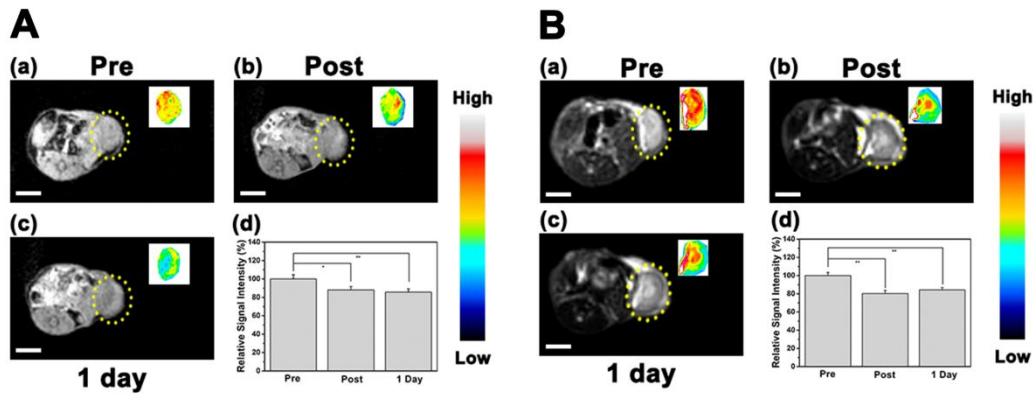

**Figure S23.** (A) Representative  $T_1$ -weighted MR images of 4T1 tumor-bearing mice (a) before, (b) immediately post, and (c) one day after *i.t.* injection of PEG/ $\text{Fe}_3\text{O}_4$  NPs. The tumor sites are circled by a yellow dashed line. Figure at the top right corner is the pseudo-color image of the tumor site. (d) Intensity changes of  $T_1$ -weighted MR signal immediately or one day after *i.t.* injection. Scale bars are 5 mm. (n = 3, mean  $\pm$  s.d., \* $p$  < 0.05, \*\* $p$  < 0.01). (B) Representative  $T_2$ -weighted MR images of 4T1 tumor-bearing mice (a) before, (b) immediately post, and (c) 1 day after *i.t.* injection of PEG/ $\text{Fe}_3\text{O}_4$  NPs. The tumor sites are circled by a yellow dashed line. Figure at the top right corner is the pseudo-color image of the tumor site. (d) Intensity changes of  $T_2$ -weighted MR signal immediately or 1 day after *i.t.* injection. Scale bars are 5 mm. (n = 3, mean  $\pm$  s.d., \*\* $p$  < 0.01).



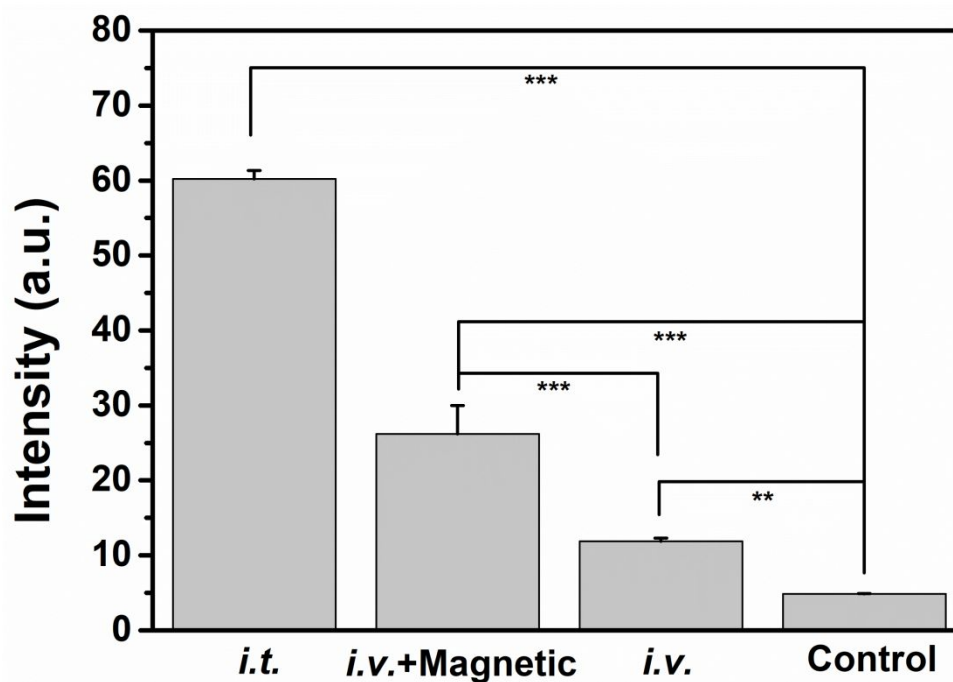

**Figure S24.** Fluorescence intensities of DCFH-DA labeled mice tumors by different treatments. ( $n = 5$ , mean  $\pm$  *s.d.*, \*\* $p < 0.01$ , and \*\*\* $p < 0.001$ ).

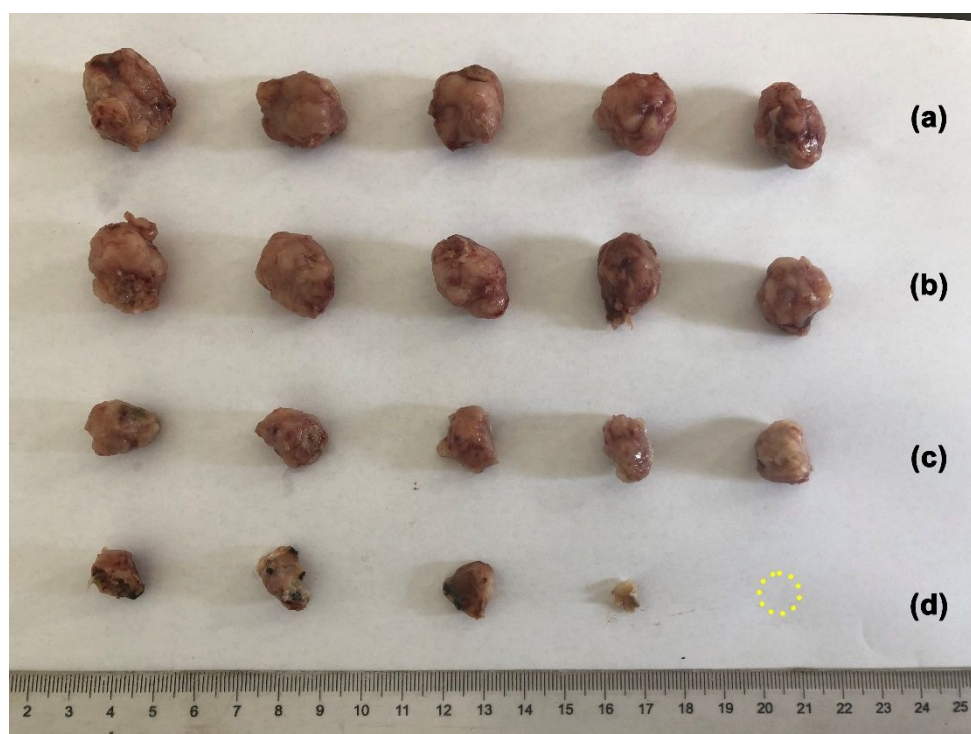

**Figure S25.** Photograph at day 19 of tumor from group (a) Control, (b) *i.v.* injection of PEG/Fe<sub>5</sub>C<sub>2</sub>@Fe<sub>3</sub>O<sub>4</sub> NPs, (c) *i.v.* injection of PEG/Fe<sub>5</sub>C<sub>2</sub>@Fe<sub>3</sub>O<sub>4</sub> NPs with magnetic targeting, (d) *i.t.* injection of PEG/Fe<sub>5</sub>C<sub>2</sub>@Fe<sub>3</sub>O<sub>4</sub> NPs. One tumor in group (d) was completely inhibited, and showed by a dash circle. The initial tumor sizes were about 100 mm<sup>3</sup>.

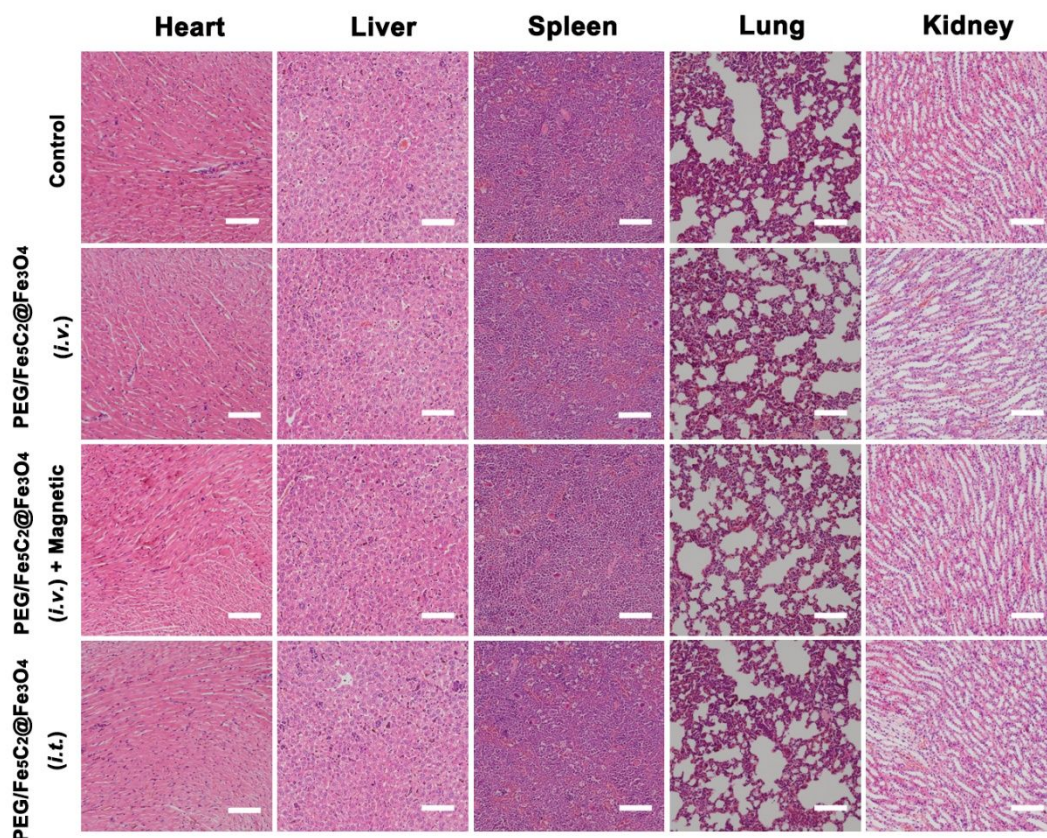

**Figure S26.** H&E stained images of major organs collected from different groups of mice. Scale bars are 500  $\mu\text{m}$ .

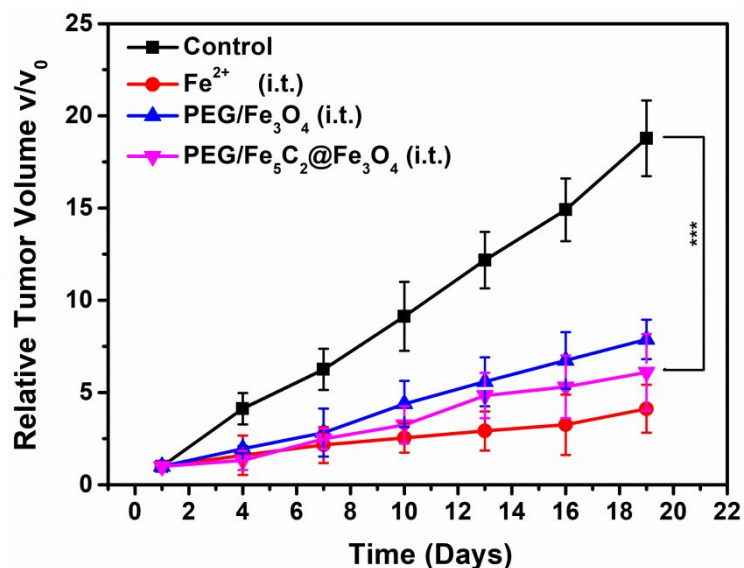

**Figure S27.** Time course change in the relative tumor volume after different treatments. The initial tumor sizes were about 150  $\text{mm}^3$ . ( $n = 5$ , mean  $\pm$  s.d., \*\*\* $p < 0.001$ ).

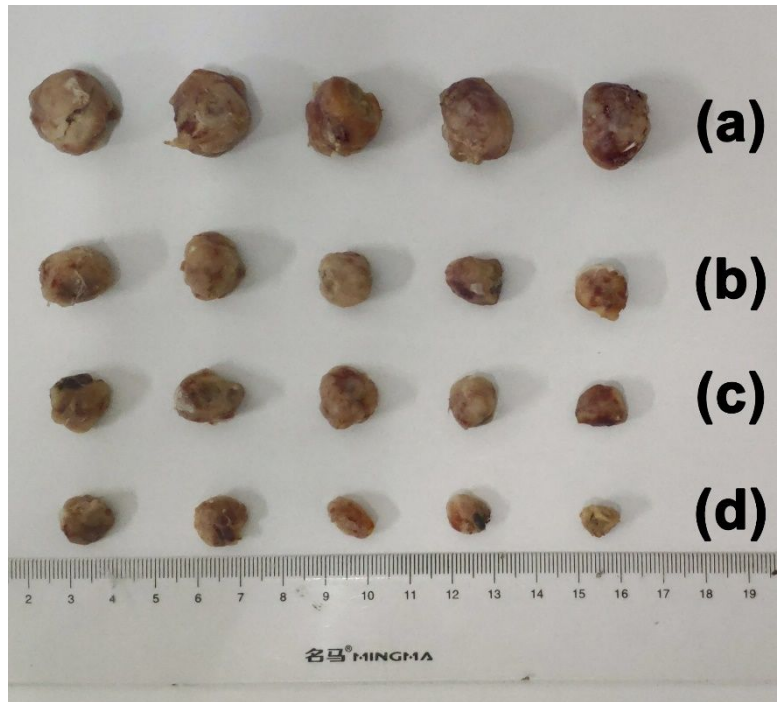

**Figure S28.** Photographs at day 19 of tumor from group (a) Control, (b) *i.t.* injection of PEG/Fe<sub>3</sub>O<sub>4</sub> NPs, (c) *i.t.* injection of PEG/Fe<sub>3</sub>C<sub>2</sub>@Fe<sub>3</sub>O<sub>4</sub> NPs, (d) *i.t.* injection of Fe<sup>2+</sup>. The initial tumor sizes were about 150 mm<sup>3</sup>.

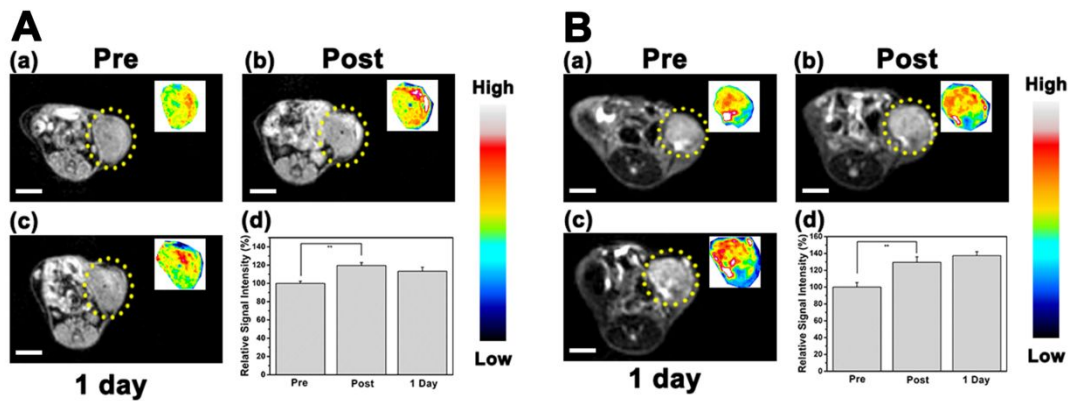

**Figure S29.** (A) Representative  $T_1$ -weighted MR images of 4T1 tumor-bearing mice (a) before, (b) immediately post, and (c) one day after *i.t.* injection of Fe<sup>2+</sup> ions (FeCl<sub>2</sub>). The tumor sites are circled by a yellow dashed line. Figure at the top right corner is the pseudo-color image of the tumor site. (d) Intensity changes of  $T_1$ -weighted MR signal immediately or one day after *i.t.* injection. Scale bars are 5 mm. (n = 3, mean  $\pm$  s.d., \*\* $p$  < 0.01) (B) Representative  $T_2$ -weighted MR images of 4T1 tumor-bearing mice (a) before, (b) immediately post, and (c) 1 day after *i.t.* injection of Fe<sup>2+</sup> ions (FeCl<sub>2</sub>). The tumor sites are circled by a yellow dashed line. Figure at the top right corner is the pseudo-color image of the tumor site. (d) Intensity changes of  $T_2$ -weighted MR signal immediately or 1 day after *i.t.* injection. Scale bars are 5 mm. (n = 3, mean  $\pm$  s.d., \*\* $p$  < 0.01).



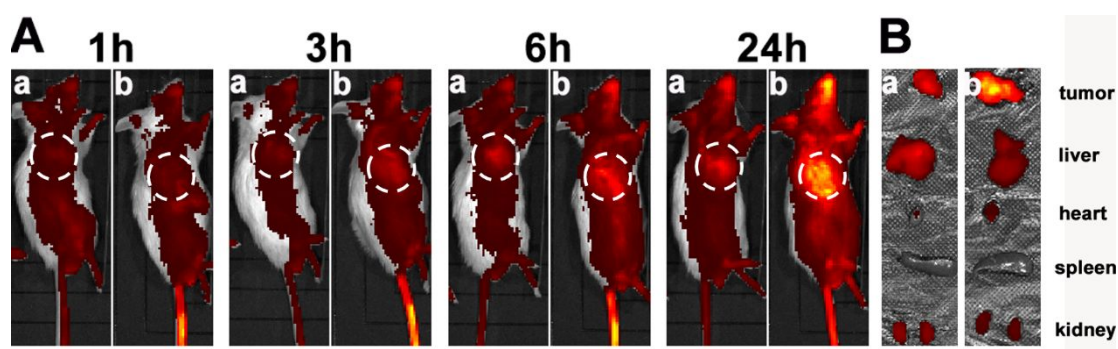

**Figure S30.** (A) *In vivo* NIR imaging of tumor-bearing mice intravenous injected with IR783-labeled PEG/Fe<sub>5</sub>C<sub>2</sub>@Fe<sub>3</sub>O<sub>4</sub> NPs at 1, 3, 6, and 24 h post-injection (a: PEG/Fe<sub>5</sub>C<sub>2</sub>@Fe<sub>3</sub>O<sub>4</sub>-IR783; b: PEG/Fe<sub>5</sub>C<sub>2</sub>@Fe<sub>3</sub>O<sub>4</sub>-IR783 + Magnet. Circled area: tumor site). (B) NIR imaging of various tissues at 24 h post-injection (a: PEG/Fe<sub>5</sub>C<sub>2</sub>@Fe<sub>3</sub>O<sub>4</sub>-IR783; b: PEG/Fe<sub>5</sub>C<sub>2</sub>@Fe<sub>3</sub>O<sub>4</sub>-IR783 + Magnet).

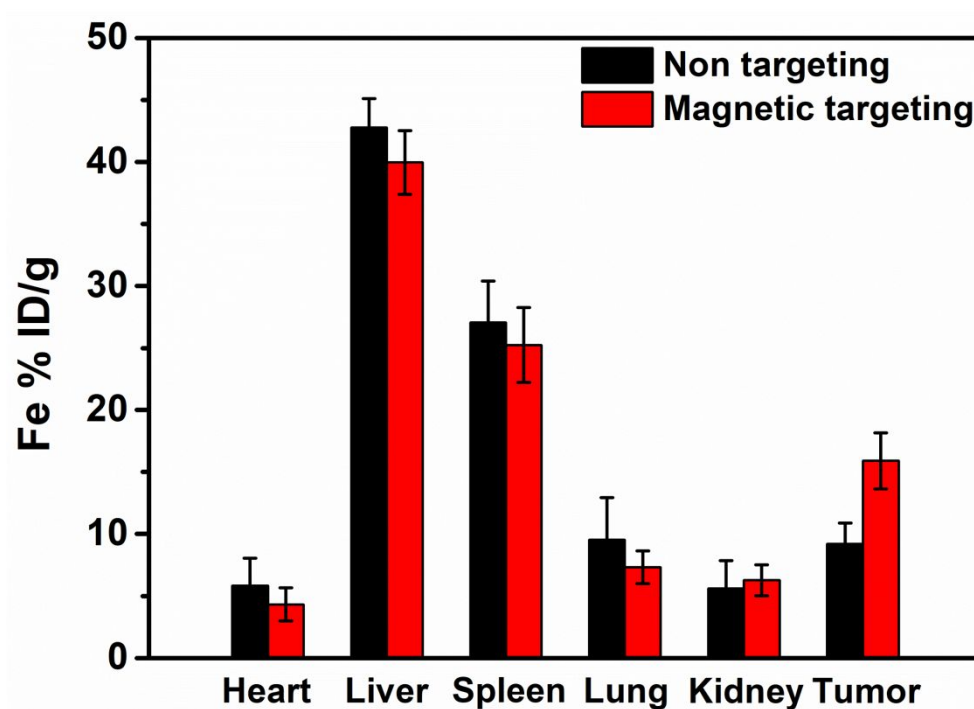

**Figure S31.** Biodistribution of Fe (% administrated dose (ID) of Fe per gram of tissues) in main tissues and tumors after *i.v.* administrations with or without magnetic targeting for 24 h.
